# Supplementary material
Source: MDPI journal article supplement (https://www.mdpi.com/2673-3501/2/3/16)
Supplement: s1 [file s1]

Archive with 1 entries (1 files):
- applnano-1301199-supplementary.pdf
